# Supplementary material for: Combined In Silico and In Vivo Analyses Reveal Role of Hes1 in Taste Cell Differentiation
Source: PubMed Central journal article supplement (PMC2655725; doi:10.1371/journal.pgen.1000443), 2009-04-03

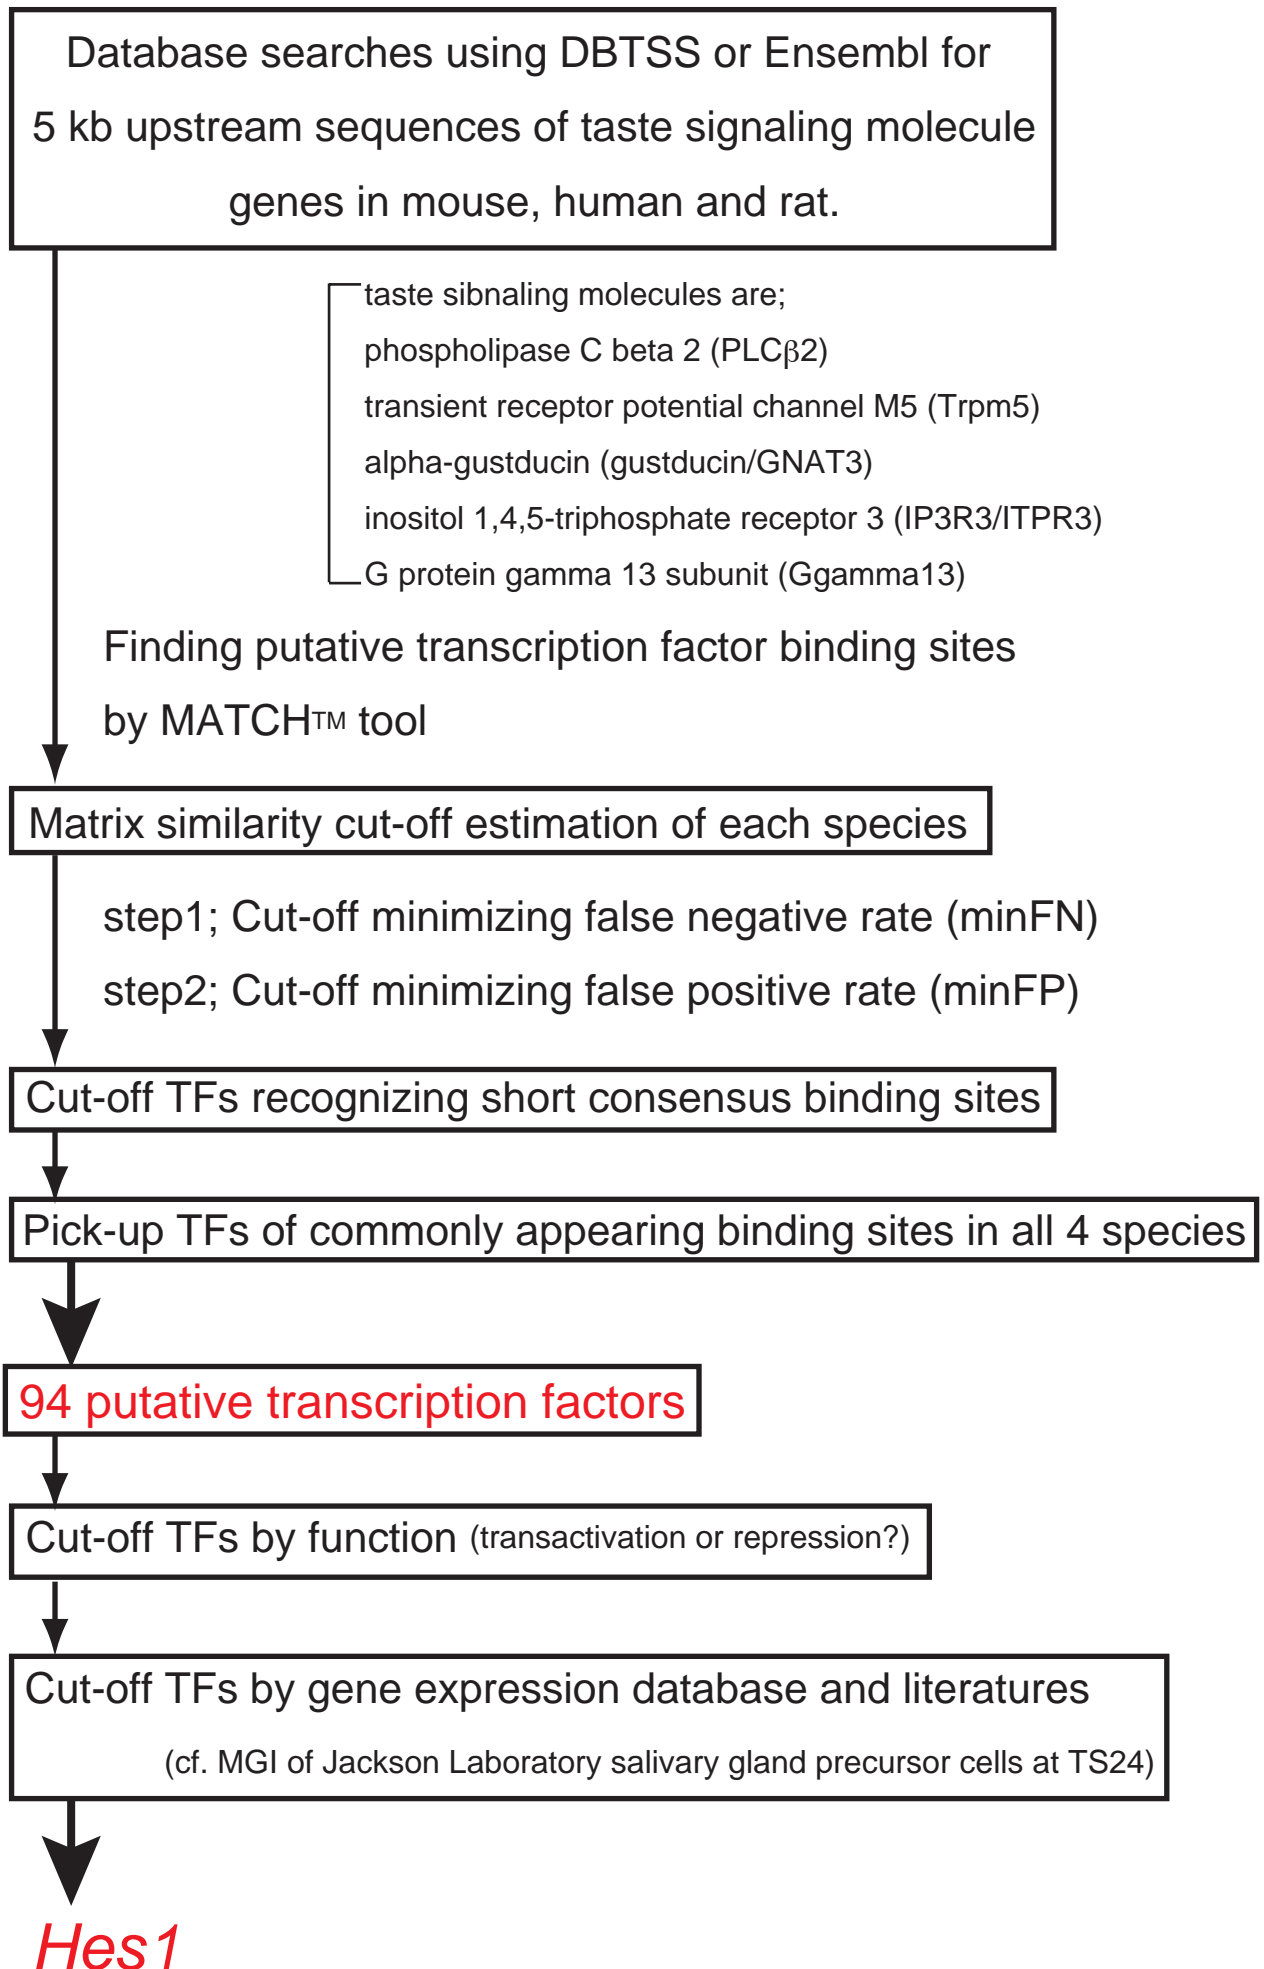

Supplement: pgen.1000443.s003.pdf [file pgen.1000443.s003.pdf]
