# Supplementary material for: Combined In Silico and In Vivo Analyses Reveal Role of Hes1 in Taste Cell Differentiation
Source: PubMed Central journal article supplement (PMC2655725; doi:10.1371/journal.pgen.1000443), 2009-04-03
Supplement: pgen.1000443.s005.pdf [file pgen.1000443.s005.pdf]

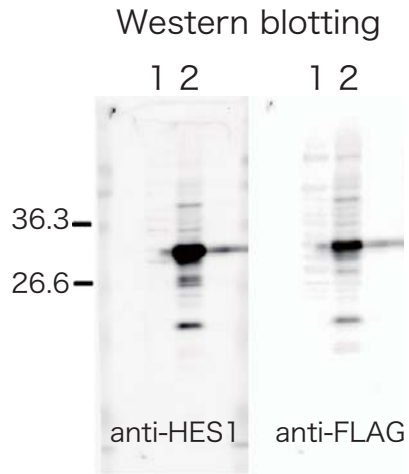

1: cos7 lysate  
2: cos7 transfected with FLAG-HES1 lysate

*in situ* hybridization

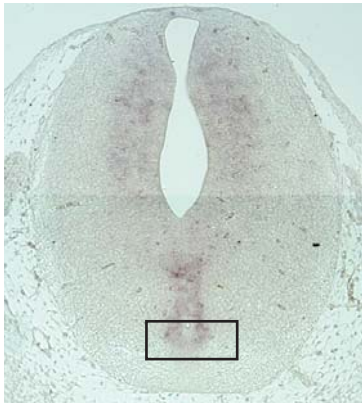

immunohistochemistry with  
affinity purified antibody

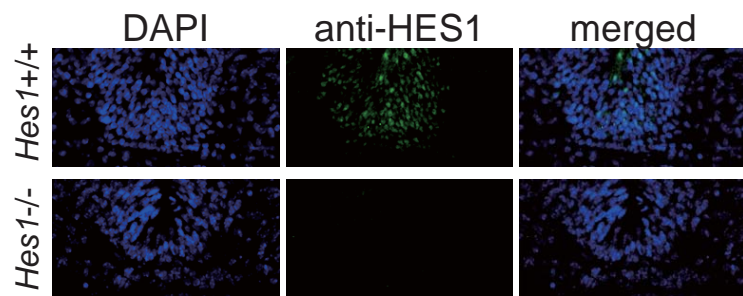

11 dpc embryo  
spinal cord
