# Supplementary material for: Combined In Silico and In Vivo Analyses Reveal Role of Hes1 in Taste Cell Differentiation
Source: PubMed Central journal article supplement (PMC2655725; doi:10.1371/journal.pgen.1000443), 2009-04-03
Supplement: pgen.1000443.s006.pdf [file pgen.1000443.s006.pdf]

Table S1. TRCSM-positive cells counted in CVP at E17

| marker combination                     | number of CVP <sup>1</sup> | single TRCSM positive cells <sup>2</sup> | double TRCSMs positive cells <sup>3</sup> | overlapping of two TRCSMs (%) |
|----------------------------------------|----------------------------|------------------------------------------|-------------------------------------------|-------------------------------|
| PLC $\beta$ 2/IP3R3                    | 7                          | 4 (0.57)                                 | 4 (0.57)                                  | 100                           |
| GUSTDUCIN/IP3R3                        | 5                          | 3 (0.6)                                  | 3 (0.6)                                   | 100                           |
| <i>Plc<math>\beta</math>2/Ggamma13</i> | 5                          | 3 (0.6)                                  | 3 (0.6)                                   | 100                           |
| <i>Plc<math>\beta</math>2/Trpm5</i>    | 5                          | 3 (0.6)                                  | 3 (0.6)                                   | 100                           |

1 Total number of CVP analyzed.

2 Total number of cells which exhibited immunoreactivity against at least one of two markers.

Number in rectangles indicate average number of TRCSM positive cells per single CMV.

3 Total number of cells which exhibited immunoreactivity against both two markers.
