# Supplementary material for: Combined In Silico and In Vivo Analyses Reveal Role of Hes1 in Taste Cell Differentiation
Source: PubMed Central journal article supplement (PMC2655725; doi:10.1371/journal.pgen.1000443), 2009-04-03
Supplement: pgen.1000443.s007.pdf [file pgen.1000443.s007.pdf]

Table S2.  
The list of transcription factors identified by *in silico* analyses

| Gene families | Gene symbols         |
|---------------|----------------------|
| Aire          | aire                 |
| Ap-1          | ap-1                 |
| Ap-2          | ap-2alpha            |
|               | ap-2alphaa           |
|               | ap-2gamma            |
|               | ap-2rep              |
| AP-4          | ap-4                 |
| Ar            | ar                   |
| Areb          | areb6                |
| Arp           | arp-1                |
| Atf           | atf2                 |
|               | atf4                 |
|               | atf6                 |
| Arnt          | arnt                 |
| Brca1         | brca1:usf2           |
| Car           | car                  |
| Cdp           | cdp                  |
| C/ebp         | c/ebpbeta            |
|               | c/ebpgamma           |
| Coup          | coup                 |
| Cp2           | cp2/lbp-1c/lzf       |
| E-box         | e2a                  |
|               | e47                  |
| Elf           | elf-1                |
| Elk           | elk-1                |
| Ets           | c-ets-1 68           |
|               | c-ets-1 p54          |
|               | c-ets-2              |
| Fac           | fac1                 |
| Foxo          | foxo1                |
| Gabp          | gabp                 |
| Gata          | gata-1               |
|               | gata-2               |
|               | gata-3               |
|               | gata-4               |
|               | gata-6               |
| Gr            | gr                   |
| Hand          | hand1:e47            |
|               | helios a             |
| Hes           | hes1                 |
| Hnf           | hnf4alpha            |
|               | hnf4 direct repeat 1 |
| Ipf           | ipf1                 |
| Ik            | ik-2                 |
| Lef1          | lef1                 |
| Lxr           | lxf                  |
| Lyf-1         | lyf-1                |
| Maf           | c-maf                |
|               | v-maf                |
| Meis          | meis1a:hoxa9         |
| Movo          | movo-b               |
| Msx           | msx-1                |
| Mi            | muscle initiator     |
| Myb           | c-myb                |

94 genes

|          |                    |
|----------|--------------------|
| MyoD     | myod               |
| Myogenin | myogenin           |
| Nerf     | nerf1a             |
| Nf-y     | nf-y               |
| NFκB     | nf-kappab          |
| Nkx2.5   | nkx2.5             |
| Pax      | pax-2              |
|          | pax-3              |
|          | pax-5              |
|          | pax-8              |
| Pea      | pea3               |
| Ppar     | pparalpha:rxralpha |
| Pu.1     | pu.1               |
| Pxr      | pxr                |
| P53      | p53 decamer        |
| Rar      | rar                |
| Rfx      | rfx1               |
| Rush     | rush-1alpha        |
| Smad     | smad4              |
| Sox      | sox10              |
| srebp    | srebp-1            |
| Stat     | stat3              |
|          | stat5a             |
| Sp3      | sp3                |
| Spz      | spz1               |
| Tata     | tata               |
| Tbx      | tbx5               |
| Tcf      | tcf1               |
|          | tcf11              |
| Ttf      | ttf1               |
| Tal      | tal-1alpha:e47     |
|          | tal-1beta:e47      |
|          | tal-1beta:itf-2    |
| Tax      | tax/creb           |
| Usf      | usf                |
| Vdr      | vdr                |
| Yy1      | yy1                |
| Zf       | zf5                |
| Zic      | zic1               |
|          | zic3               |
